# Supplementary material
Source: PubMed Central journal article supplement (PMC3884674)

## Supplementary Figure 2

Confocal immunofluorescence staining with specific markers (MBP-1 and SiglecF) unambiguously identifies eosinophils infiltrating specific tissue compartments of the oesophagus of oxazolone sensitized/topical challenged *L2-IL5* mice. Oesophageal sections from *L2-IL5* mice treated with vehicle alone vs. oxazolone were subjected to concurrent immunofluorescence staining with a rat anti-mouse **MBP-1** monoclonal antibody (**Green**) and a rabbit anti-**SiglecF** polyclonal antibody (**Red**); sections were counterstained with **DAPI** to identify cell nuclei (**Blue**). Typical sections from *L2-IL5* vehicle treated mice had no eosinophils present in the oesophageal epithelium (e) as well as the underlying lamina propria (lp) and muscularis (m). In contrast, immunofluorescence with anti-MBP-1 reveals a significant eosinophilia (**Green** staining infiltrating cells) confirmed by co-localization of staining with SiglecF (**Red** staining infiltrating cells).

L2-IL5 Vehicle

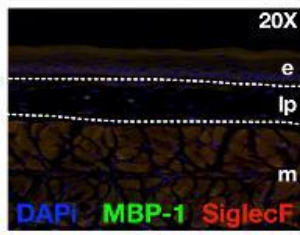

L2-IL5 OXA

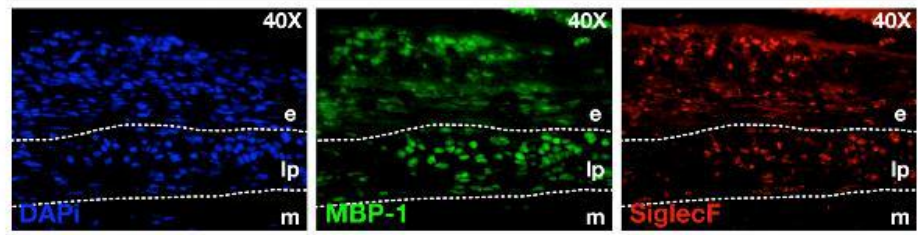

Supplement: NIHMS543854-supplement-Supplemental_Fig__2.pdf [file NIHMS543854-supplement-Supplemental_Fig__2.pdf]
